# Supplementary material for: Modeling the Effects of Vorinostat In Vivo Reveals both Transient and Delayed HIV Transcriptional Activation and Minimal Killing of Latently Infected Cells
Source: PLOS journal article supplement (doi:10.1371/journal.ppat.1005237), 2015-10-23
Supplement: S6 (10.1371/journal.ppat.1005237.s006) [file journal.ppat.1005237.s006]

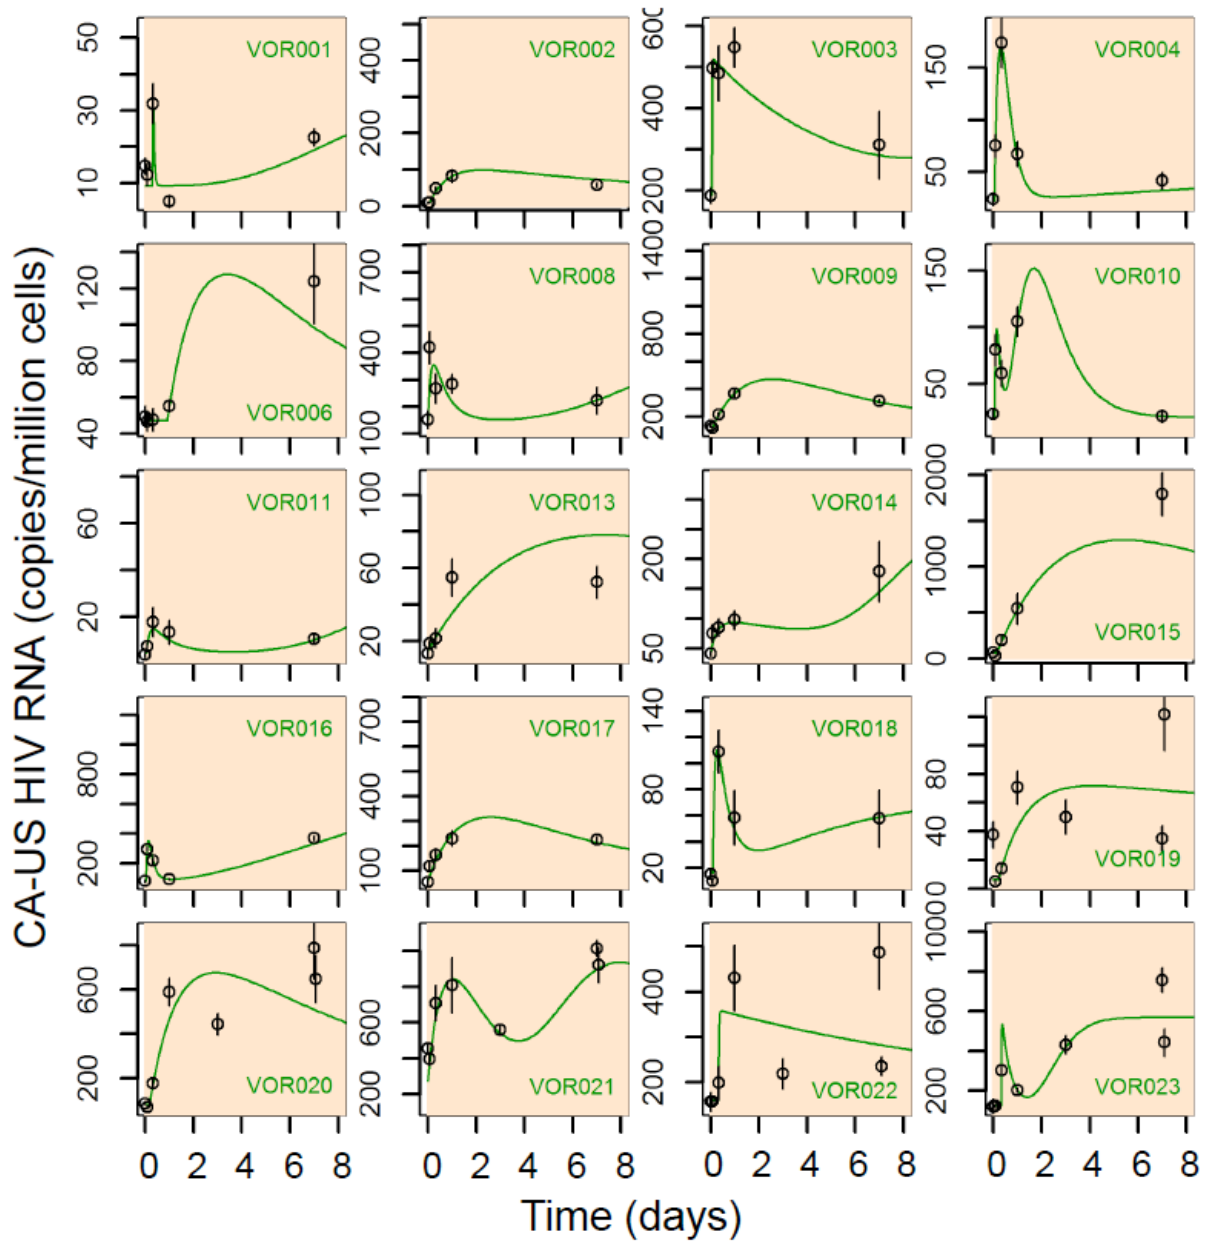

**Figure S6. The multistage delayed activation model describes the first 7-day data well in all patients.** The same simulation results as shown in Fig.3 except that the x-axis is scaled to show the agreement between the model and for the first 7-day data.
