# Supplementary material for: Modeling the Effects of Vorinostat In Vivo Reveals both Transient and Delayed HIV Transcriptional Activation and Minimal Killing of Latently Infected Cells
Source: PLOS journal article supplement (doi:10.1371/journal.ppat.1005237), 2015-10-23
Supplement: S7 (10.1371/journal.ppat.1005237.s007) [file journal.ppat.1005237.s007]

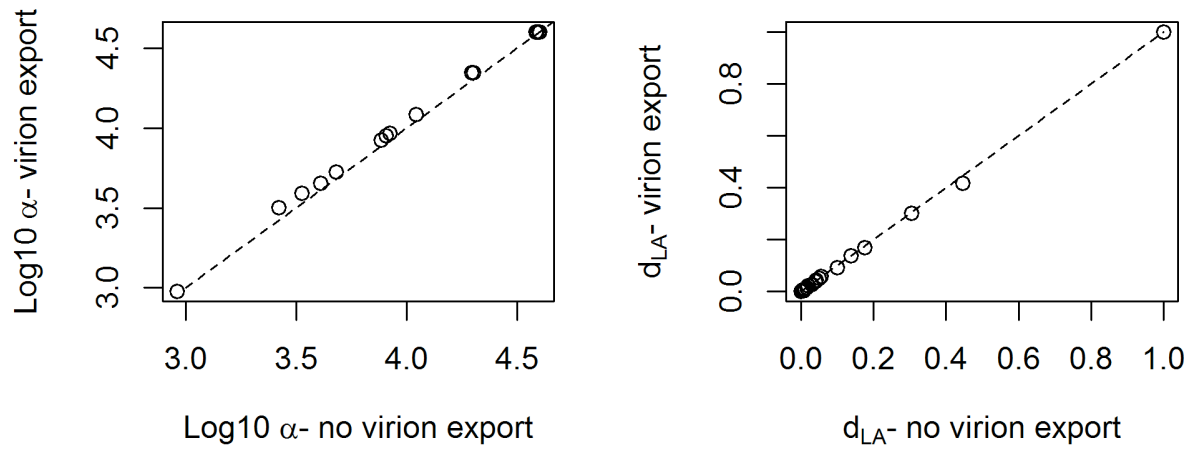

**Figure S7. Parameter estimation is robust to changes in the assumption of the virion export rate,  $\rho$ .** Plots show the comparisons of parameter estimates of the rate of CA-US HIV RNA production,  $\alpha$  in  $\text{Log}_{10}$  (left panel) and the loss rate of sustainably activated cells,  $d_{LA}$  (right panel) between the multistage delayed activation model in the main text ('without virion production') with a model assuming that activated cells produces virions at the same rate as in the productively infected cells ('virion production'). In each panel, a dot represents a pair of estimates in one patient, and the dashed lines show the line for  $y=x$ .
